# Supplementary material
Source: PubMed Central journal article supplement (PMC3143632)

**Table S1: Stability of the enzymatic activity of different peptidyl-prolyl *cis-trans* isomerases**

| Protein    | $k_{\text{cat}}/K_M (\text{M}^{-1}/\text{s}^{-1})^1$ |                          |                          |                          |
|------------|------------------------------------------------------|--------------------------|--------------------------|--------------------------|
|            | Day 1                                                | Day 3                    | Day 7                    | Day 10                   |
| GST-FKBP12 | $2.8 \pm 0.4 \cdot 10^6$                             | $3.5 \pm 0.9 \cdot 10^6$ | $1.8 \pm 0.6 \cdot 10^6$ | $1.0 \pm 0.1 \cdot 10^7$ |
| GST-FKBP52 | $3.0 \pm 0.7 \cdot 10^6$                             | $3.2 \pm 0.6 \cdot 10^6$ | $5.9 \pm 1.1 \cdot 10^6$ | $4.5 \pm 0.9 \cdot 10^6$ |
| His-FKBP65 | $1.3 \pm 0.6 \cdot 10^6$                             | $3.4 \pm 0.9 \cdot 10^6$ | $4.0 \pm 0.8 \cdot 10^6$ | $5.3 \pm 1.3 \cdot 10^6$ |
| CYPA       | $3.1 \pm 0.7 \cdot 10^6$                             | $2.8 \pm 0.7 \cdot 10^6$ | $4.6 \pm 1.0 \cdot 10^6$ | $7.2 \pm 1.2 \cdot 10^6$ |
| Pin1       | $8.4 \pm 1.7 \cdot 10^6$                             | $9.0 \pm 2.2 \cdot 10^6$ | $2.7 \pm 1.2 \cdot 10^6$ | $3.7 \pm 1.3 \cdot 10^6$ |

<sup>1</sup>1  $\mu\text{M}$  GST-FKBP12, GST-FKBP52, His-FKBP65, CYPA and Pin1 were incubated at 37°C for 10 days. Specific enzymatic activities ( $k_{\text{cat}}/K_M$ ) were determined as described in *Experimental procedures* at the beginning of the experiment and after 3, 7 and 10 days of incubation. Assays were performed with purified proteins by monitoring the absorbance of released 4-nitroanilide (pNA) with the use of chymotrypsin as an isomer-specific protein. The substrates used are the same as in Table 1. All reactions were performed in 35 mM Hepes buffer, pH 7.8 at room temperature ( $\pm 22^\circ\text{C}$ ). SEM (n=4) are shown for each protein.

**Table S2: Substrate specificity of different peptidyl-prolyl *cis-trans* isomerases**

| Protein    | Substrate              | $k_{\text{cat}}/K_M$ ( $\text{M}^{-1}/\text{s}^{-1}$ ) <sup>1</sup> |                       |                                                  |
|------------|------------------------|---------------------------------------------------------------------|-----------------------|--------------------------------------------------|
|            |                        | Calculated values                                                   | Literature values     | Ratio $k_{\text{cat}}/K_m$<br>(Table 1/Table S2) |
| GST-FKBP12 | Succ-AEPF- <i>p</i> NA | $1.2 \pm 0.6 \cdot 10^4$                                            | $6.0 \cdot 10^2$ (60) | 241.6                                            |
| GST-FKBP52 | Succ-AEPF- <i>p</i> NA | $4.9 \pm 0.1 \cdot 10^4$                                            | -                     | 62.0                                             |
| His-FKBP65 | Succ-AEPF- <i>p</i> NA | $6.0 \pm 0.1 \cdot 10^4$                                            | -                     | 22.3                                             |
| CYPA       | Succ-AHPF- <i>p</i> NA | $1.8 \pm 0.7 \cdot 10^4$                                            | $6.0 \cdot 10^5$ (60) | 168.0                                            |
| Pin1       | Succ-AAPF- <i>p</i> NA | $8.6 \pm 0.7 \cdot 10^4$                                            | (61)                  | 96.7                                             |

<sup>1</sup>Specific enzymatic activities ( $k_{\text{cat}}/K_M$ ) were determined as described in *Experimental procedures*. Assays were performed with purified proteins by monitoring the absorbance of released 4-nitroanilide (*p*NA) with the use of chymotrypsin as an isomer-specific protein. All reactions were performed in 35 mM HEPES buffer, pH 7.8 at room temperature ( $\pm 22^\circ\text{C}$ ). SEM (n=3) and literature data for the same substrate, when known, are shown for each protein.

**Table S3: Parameters describing the fibril formation of  $\alpha$ -SYN followed with Thioflavin T fluorescence in the presence of different concentrations of PPIases**

| Protein    | Concentration | $x_0^1$ | $a^1$ |
|------------|---------------|---------|-------|
| Blank      | control       | 71      | 83    |
| GST-FKBP12 | 10 $\mu$ M    | 39      | 32858 |
|            | 1 $\mu$ M     | 26      | 1819  |
|            | 10 nM         | 56      | 205   |
|            | 100 pM        | 47      | 7763  |
| GST-FKBP52 | 10 $\mu$ M    | 40      | 38945 |
|            | 1 $\mu$ M     | 37      | 3005  |
|            | 10 nM         | 37      | 460   |
|            | 100 pM        | 73      | 87    |
| His-FKBP65 | 10 $\mu$ M    | 35      | 27929 |
|            | 1 $\mu$ M     | 70      | 4063  |
|            | 10 nM         | 92      | 1596  |
|            | 100 pM        | 71      | 43    |
| CYPA       | 10 $\mu$ M    | 31      | 1037  |
|            | 1 $\mu$ M     | 51      | 144   |
|            | 10 nM         | 51      | 296   |
|            | 100 pM        | 60      | 133   |
| Pin1       | 10 $\mu$ M    | 56      | 3413  |
|            | 1 $\mu$ M     | 53      | 16    |
|            | 10 nM         | 62      | 99    |
|            | 100 pM        | 118     | 82    |

<sup>1</sup> $x_0$  is the half-time of fibril formation and  $a$  is the total increase in fluorescence. Both parameters were determined as described in *Experimental procedures*. Typical errors (standard deviation) were 1-10% of the calculated parameters.

**Table S4: Parameters describing the aggregation of  $\alpha$ -SYN followed with turbidity under influence of different concentrations of PPIases**

| Protein    | Concentration           | $x_0^1$ | $a^1$ |
|------------|-------------------------|---------|-------|
| Blank      | control                 | 87      | 0.002 |
| GST-FKBP12 | 10 $\mu$ M              | 32      | 0.583 |
|            | 1 $\mu$ M               | 20      | 0.132 |
|            | 10 nM                   | 82      | 0.003 |
|            | 100 pM                  | 63      | 0.057 |
| GST-FKBP52 | 10 $\mu$ M              | 38      | 0.412 |
|            | 1 $\mu$ M               | 16      | 0.073 |
|            | 10 nM                   | 22      | 0.013 |
|            | 100 pM                  | 82      | 0.003 |
| His-FKBP65 | 10 $\mu$ M              | 25      | 0.321 |
|            | 1 $\mu$ M               | 18      | 0.077 |
|            | 10 nM                   | 68      | 0.045 |
|            | 100 pM                  | 82      | 0.003 |
| CYPA       | 10 $\mu$ M              | 25      | 0.091 |
|            | 1 $\mu$ M               | 81      | 0.003 |
|            | 10 nM                   | 82      | 0.003 |
|            | 100 pM                  | 79      | 0.005 |
| Pin1       | 10 $\mu$ M <sup>2</sup> | -       | -     |
|            | 1 $\mu$ M               | 71      | 0.003 |
|            | 10 nM                   | 75      | 0.010 |
|            | 100 pM                  | 94      | 0.003 |

<sup>1</sup> $x_0$  is the half-time of aggregation and  $a$  is the total increase in turbidity at 350 nm. Both parameters were determined as described in *Experimental procedures*. Typical errors (standard deviation) were 1-10% of the calculated parameters.

<sup>2</sup>Since the curve representing 10  $\mu$ M of Pin1 did not follow an exponential course, the half-time of aggregation could not be calculated.

## Supplementary figure legends

### **Figure S1: SDS-PAGE analysis of recombinant PPIases**

Purified PPIases were separated in a 4-12% polyacrylamide gel and visualized with optimized Coomassie G-250. In each lane, 1  $\mu$ g of protein was loaded. Lane 1, protein marker; lane 2, GST-FKBP12; lane 3, GST-FKBP52; lane 4, His-FKBP65; lane 5: Pin1; lane 6: CYPA; lane 7,  $\alpha$ -SYN.

### **Figure S2: Co-localization of PPIases and Lewy bodies in the brain of a PD patient**

Confocal microscopy for ubiquitin (A), FKBP12 (B), FKBP38 (C), FKBP52 (D), FKBP65 (E), CYPA (F) or Pin1 (G) and  $\alpha$ -SYN positive LBs in the substantia nigra of a PD patient (Braak stage 6). Left panels (1), white light image. Left middle panels (2), immunohistochemical staining for  $\alpha$ -SYN is shown in green. Right middle panels (3), immunohistochemical staining for ubiquitin, FKBP12, FKBP38, FKBP52, FKBP65, CYPA or Pin1 is shown in red. Right panels (4), overlap image. Scale bars, 20  $\mu$ m. Red and white arrows depict the pigment of dopaminergic neurons and Lewy bodies respectively.

**Figure S1**

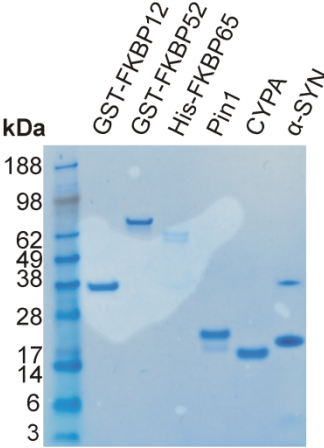

Figure S2

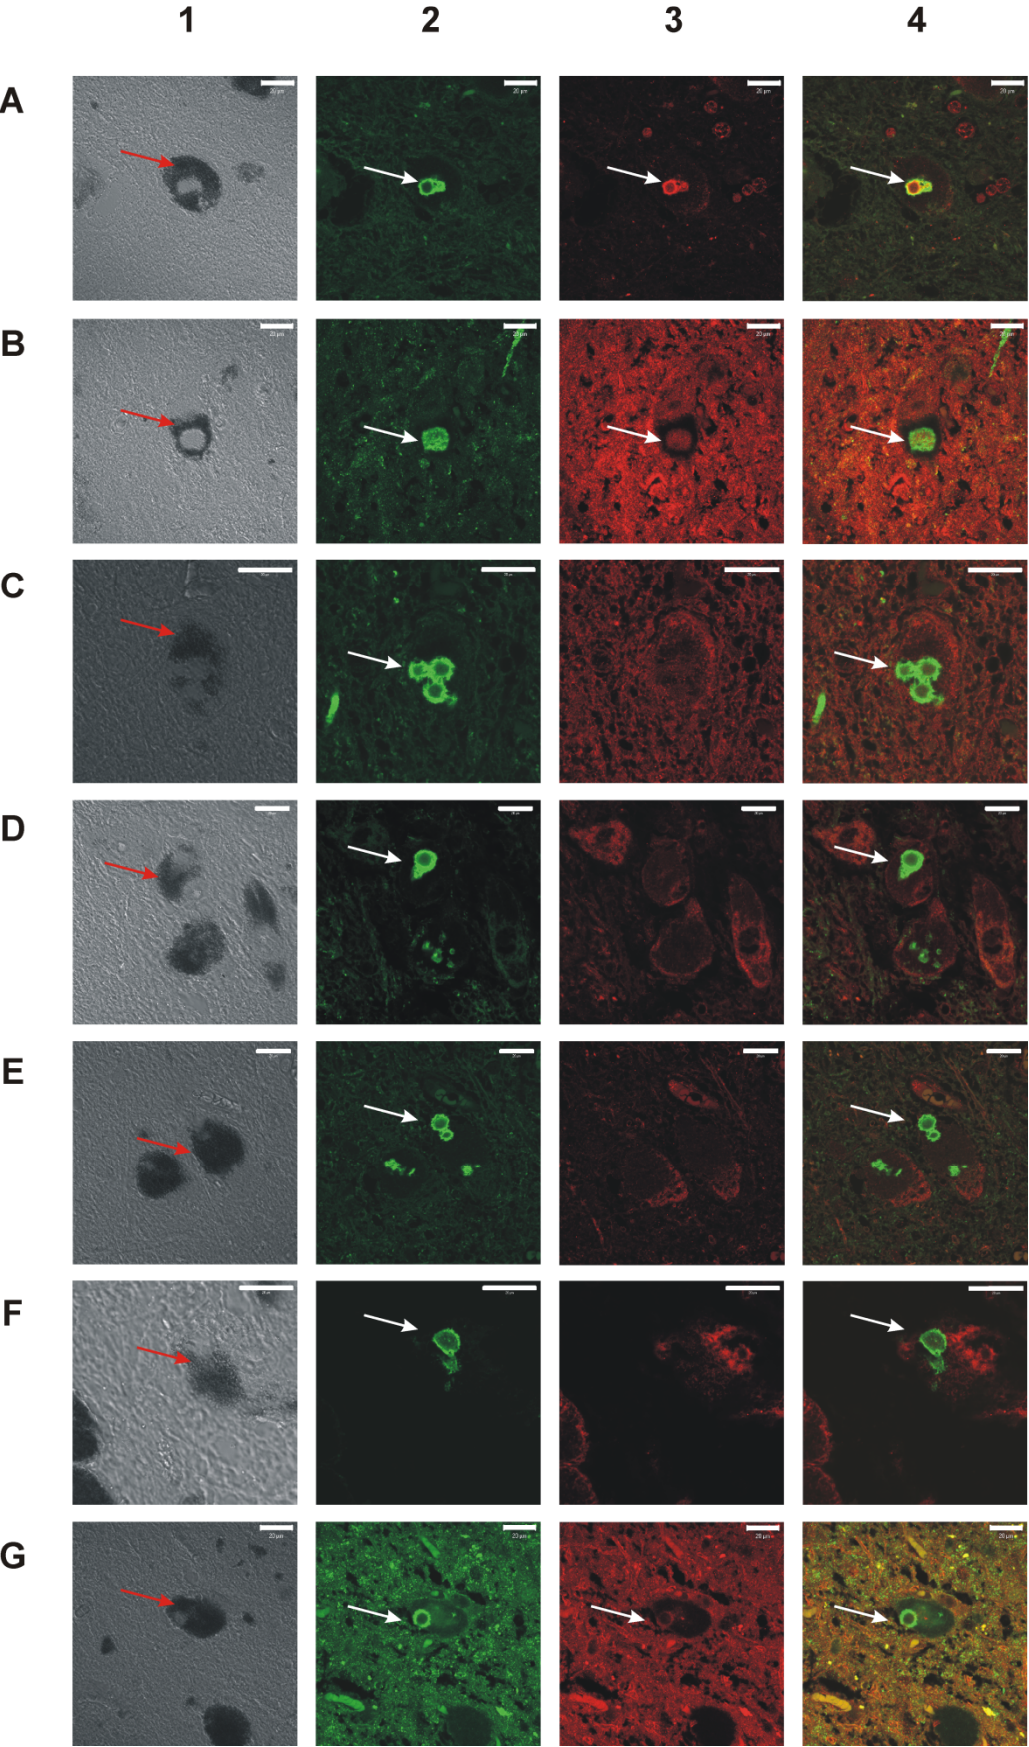

Supplement: supp_M110.182303_jbc.M110.182303-1.pdf [file supp_M110.182303_jbc.M110.182303-1.pdf]
